# Supplementary material for: Clinical Performance of Rapid and Point-of-Care Antigen Tests for SARS-CoV-2 Variants of Concern: A Living Systematic Review and Meta-Analysis
Source: Viruses. 2022 Jul 6;14(7):1479. doi: 10.3390/v14071479 (PMC9324571; doi:10.3390/v14071479)
Supplement: Supplementary file 1 [file viruses-14-01479-s001.zip › Table S1.xlsx]

## Sheet: S1 Table
Table S1. Raw dataset for the evaluation of rapid antigen tests for SARS-CoV-2 variants.
Clincal presentation	Study	Sample type	RATs	TP	FN	FP	TN	Total	Study location
Mixed	Alpha
	Jian et al. [2022]	NP swab	Antigen Rapid Test Kit	55	17	15	2009	2096	Taiwan
	Ollier et al. [2022]	NP swab	BioSpeedia COVID19 Nasal Antigen Test (BioSpeedia, Gutenberg, France)	32	14	1	943	990	France
	Delta
	Poopalasingam et al. [2022]	NP swab	STANDARD Q COVID-19 Ag Test (SD Biosensor, Suwon, Korea)	43	32	2	610	687	German
	Takeuchi et al. [2022]	NP swab	QuickNavi-Flu+COVID19 Ag (Denka Co., Tokyo, Japan)	228	54	3	1225	1510	Japan
	Takeuchi et al. [2022]	Nasal swab	QuickNavi-Flu+COVID19 Ag (Denka Co., Tokyo, Japan)	158	75	0	629	862	Japan
	Delta and Omicron
	Schrom et al. [2022]	Nasal swab	BinaxNOW COVID-19 Antigen Self Test (Abbott, Chicago, IL)	182	114	14	421	731	USA
Symptomatic	Alpha
	Ollier et al. [2022]	NP swab	BioSpeedia COVID19 Nasal Antigen Test (BioSpeedia, Gutenberg, France)	29	6	1	440	476	France
	Beta
	Akingba et al. [2021]	NP swab	PanBio SARS-CoV-2 RTD (Abbott, Chicago, IL)	101	45	3	509	658	South Africa
	Delta
	Takeuchi et al. [2022]	NP swab	QuickNavi-Flu+COVID19 Ag (Denka Co., Tokyo, Japan)	151	20	1	465	637	Japan
	Takeuchi et al. [2022]	Nasal swab	QuickNavi-Flu+COVID19 Ag (Denka Co., Tokyo, Japan)	98	35	1	318	452	Japan
Asymptomatic	Alpha
	Ollier et al. [2022]	NP swab	BioSpeedia COVID19 Nasal Antigen Test (BioSpeedia, Gutenberg, France)	3	8	0	501	512	France
	Delta
	Takeuchi et al. [2022]	NP swab	QuickNavi-Flu+COVID19 Ag (Denka Co., Tokyo, Japan)	77	34	3	760	874	Japan
	Takeuchi et al. [2022]	Nasal swab	QuickNavi-Flu+COVID19 Ag (Denka Co., Tokyo, Japan)	60	40	0	311	411	Japan
*Sensitivity and specificity are expressed as value (95% confidence interval).
RATs, rapid antigen tests; TP, true postive; FN, false negative; FP, false positive; TN, true negative; Mixed, symptomatic and asymptomatic; NP, nasopharyngeal.
